# Supplementary material for: Facile and visual detection of acetylcholinesterase inhibitors by carbon quantum dots
Source: Royal Society of Chemistry journal article supplement (doi:10.1039/c9nj02347j), 2019-01-01
Supplement: c9nj02347j1.pdf [file c9nj02347j1.pdf]

## Facile and Visual Detection of Acetylcholinesterase Inhibitors by Carbon Quantum Dot

Reshma<sup>a</sup>, Bhanushree Gupta<sup>b</sup>, Rahul Sharma<sup>c</sup> and Kallol K Ghosh<sup>a\*</sup>

<sup>a</sup>School of Studies in Chemistry, Pt. Ravishankar Shukla University, Raipur (C.G.) 492010, India

<sup>b</sup>Centre for Basic Sciences, Pt. Ravishankar Shukla University, Raipur (C.G.) 492010, India

<sup>c</sup>Department Of Plant Physiology, Agri.Biochemistry, Medicinal & Aromatic Plants, Indira Gandhi Krishi Vishwavidyalaya, Raipur (C.G.) 492012, India

### Supplementary Data

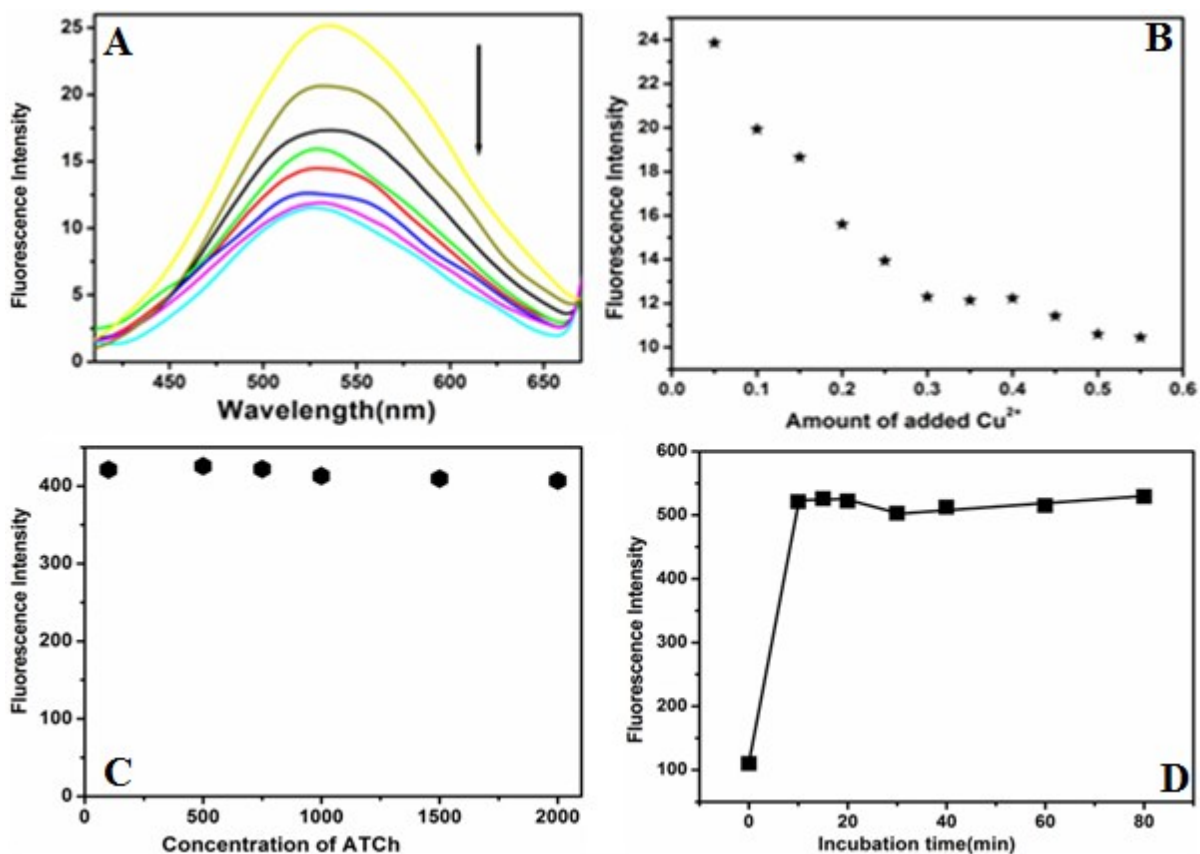

**Figure S1** (A) Fluorescence spectra of CQDs-Cu<sup>2+</sup> system (increasing amount of Cu<sup>2+</sup>) (B) The fluorescence intensity of CQDs and Increasing amount of Cu<sup>2+</sup> (C) The influence of amount of added ATChI on the fluorescence of CQDs- Cu<sup>2+</sup> (D) The fluorescence intensity of CQDs- Cu<sup>2+</sup>-ATChI-AChE verses different incubation time at room temperature.

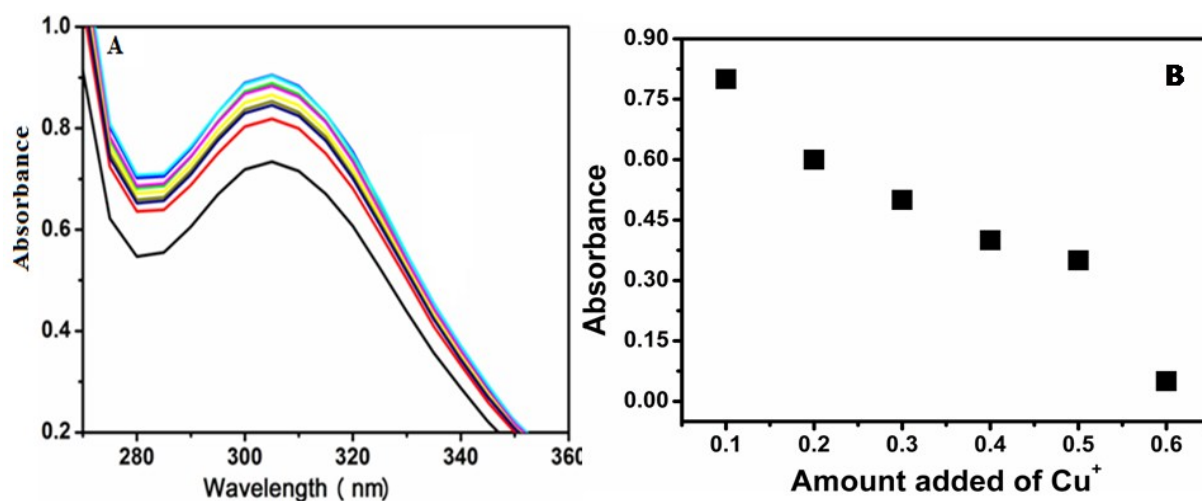

**Figure S2** (A) UV-Vis spectra of CQDs-Cu<sup>2+</sup> system (increasing amount of Cu<sup>2+</sup>) (B) The absorbance of CQDs and Increasing amount of Cu<sup>2+</sup>

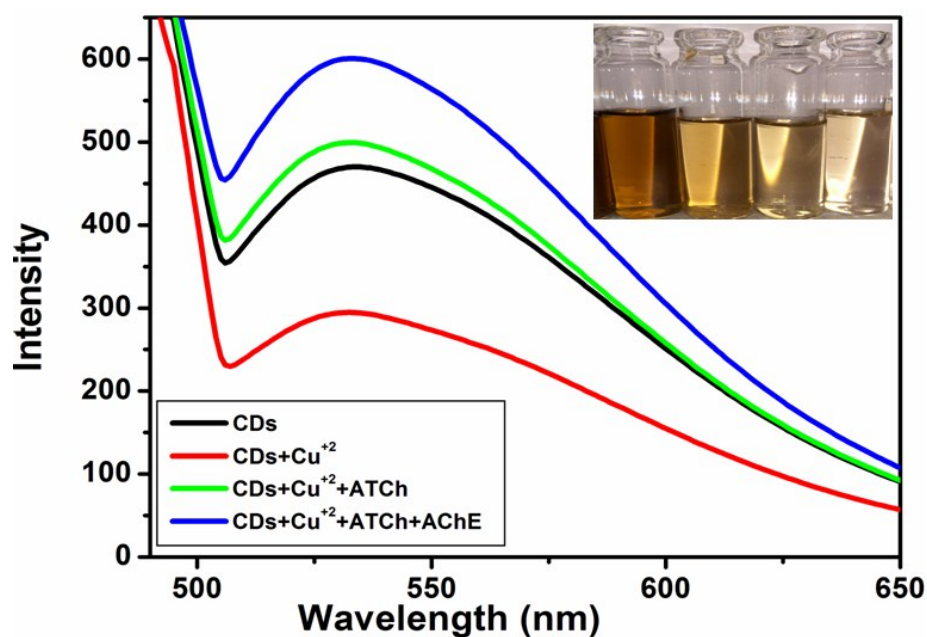

**Figure S3.** Changes of fluorescence spectra of CQDs in the presence of different composition: (a) mere CQDs, (b) in the presence of Cu<sup>2+</sup> (10.5  $\mu$ M), (c) in the presence of Cu<sup>2+</sup> (10.5  $\mu$ M) and ATCh (1257.5  $\mu$ M), (d) in the presence of Cu<sup>2+</sup> (10.5  $\mu$ M), ATCh (1257.5  $\mu$ M) and AChE (50 mU/ml) after 60 min incubation.

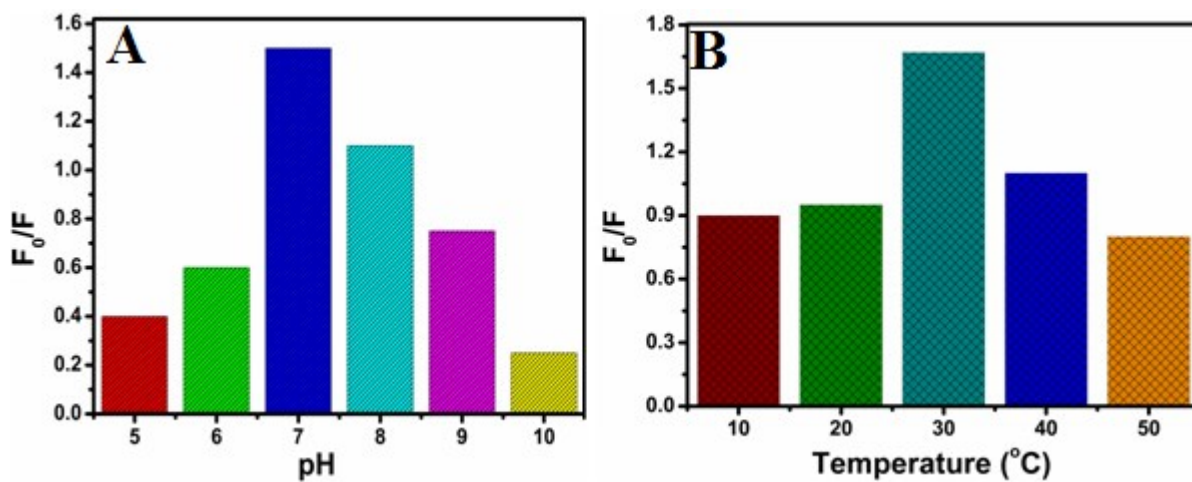

**Figure S4** (A) The pH effect; (B) temperature effect of mixture (CQDs,  $\text{Cu}^{2+}$ , ATChI, AChE).

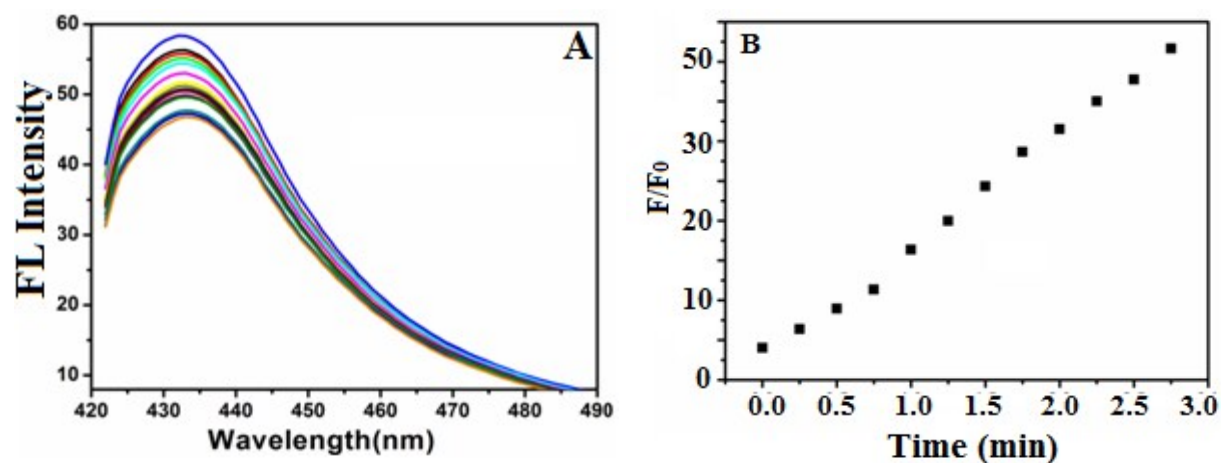

**Figure S5.** (A) Emission spectra of the assay solution containing CQDs,  $\text{Cu}^{2+}$  and ATChI with increasing level of AChE (B) The fitting curve between fluorescence intensity and AChE level at room temperature.

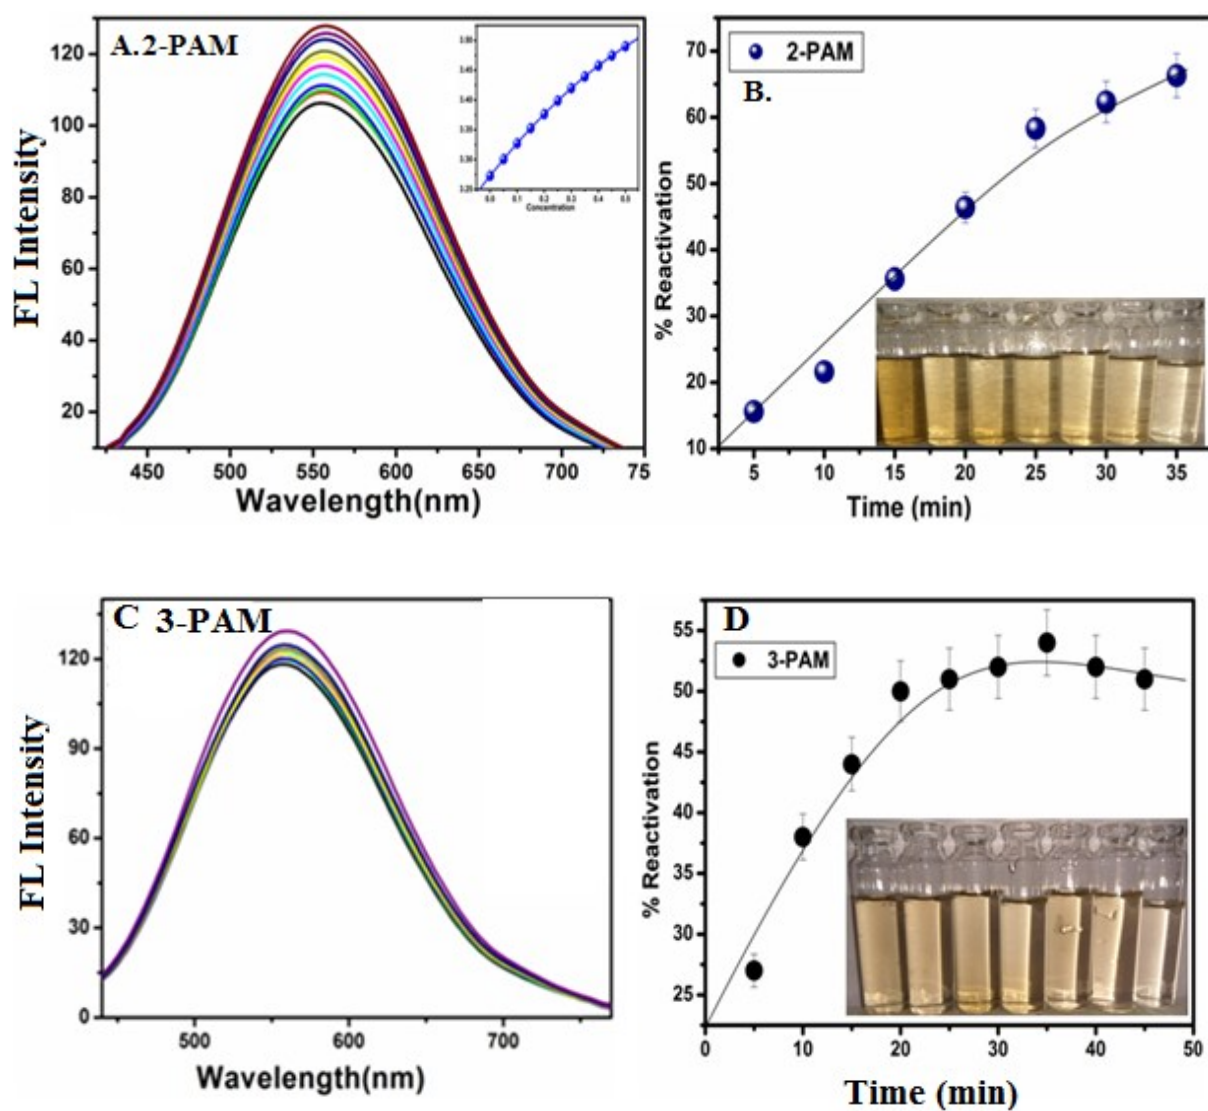

**Figure S6** Fluorescence spectra of time and concentration-dependent reactivation of POX-inhibited AChE by (A&B) 2-PAM ; (C&D) 3-PAM at room temperature (pH 7.4).
